# Supplementary material for: Redundant Trojan horse and endothelial-circulatory mechanisms for host-mediated spread of Candida albicans yeast
Source: PubMed Central journal article supplement (PMC7447064; doi:10.1371/journal.ppat.1008414), 2020-08-10

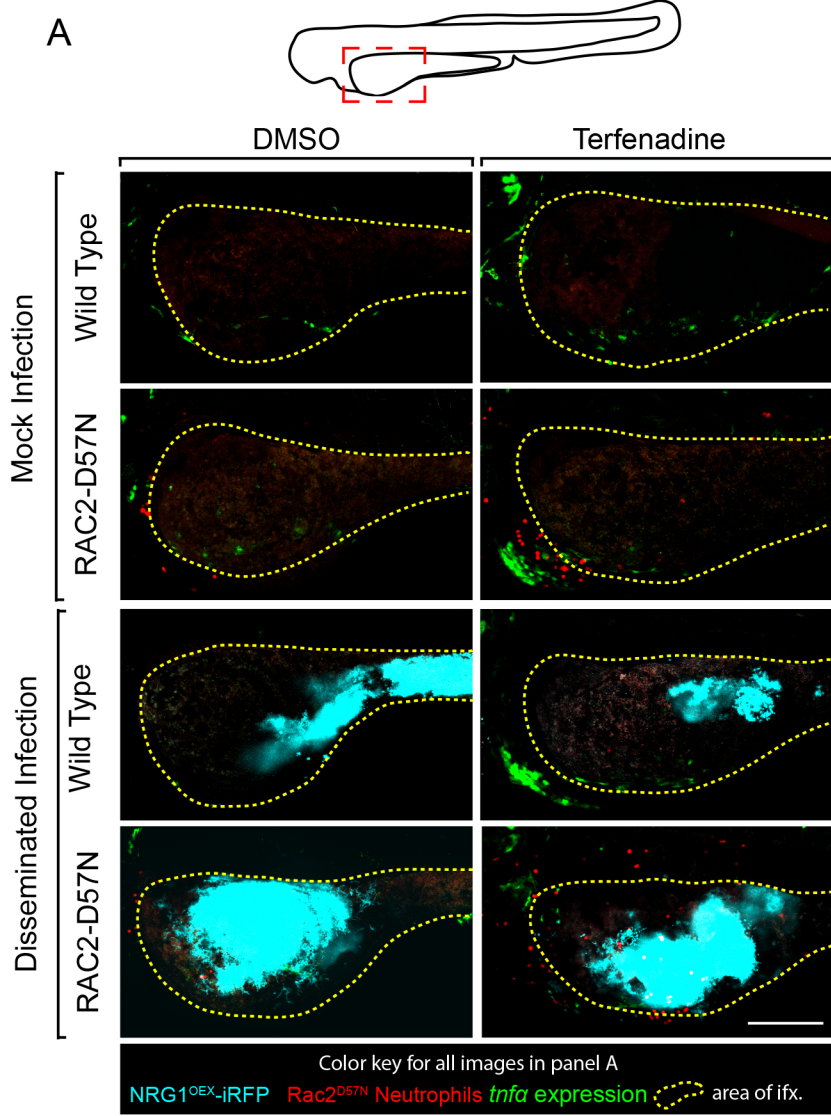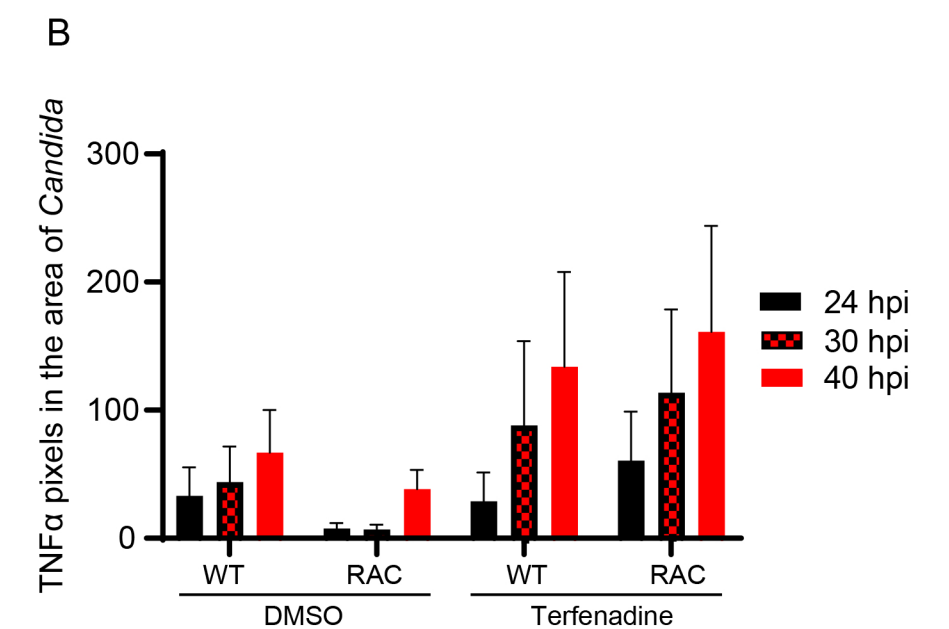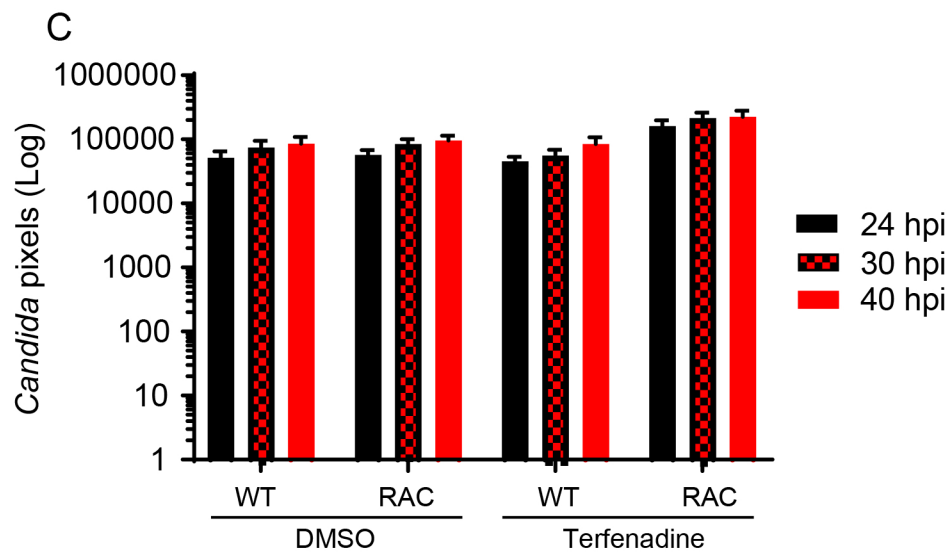

Supplement: ppat.1008414.s011.pdf [file ppat.1008414.s011.pdf]
